# Supplementary material
Source: PubMed Central journal article supplement (PMC3207411)

**Supplemental Figure 2: V272L mutant, but not K245A or  $\Delta$ CC, is viable when expressed in BS16 strain.** **A.** Western blot assay showing expressions of wild-type and mutant SUV3s. ARP3 serves as a loading control. **B.** Growth assay showing the survival of cells expressing null (vector) or HA-tagged wild-type SUV3, K245A, V272L, and  $\Delta$ CC on galactose and glycerol containing -Leu plates.

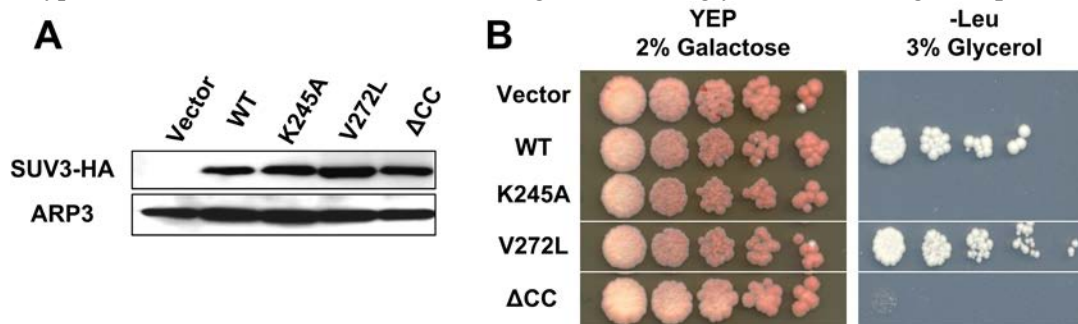

Supplement: supp_M111.257956_jbc.M111.257956-2.pdf [file supp_M111.257956_jbc.M111.257956-2.pdf]
